# Supplementary material
Source: publisher figshare collection journal article supplement (https://sage.figshare.com/ndownloader/files/17855585)
Supplement: Supplementary file 1 [file 17855585]

| ***PDGFRB* Sequence Variants** | **Number of Cases** | **Source Reference** |
| --- | --- | --- |
| R561C | 12 | Cheung et al., 2013 |
| N666K | 2 | Cheung et al., 2013 |
| R561C | 2 | Agaimy et al., 2017 |
| Y562C | 2 | Agaimy et al., 2017 |
| Y562D | 1 | Agaimy et al., 2017 |
| I564_W566delinsR | 1 | Agaimy et al., 2017 |
| W566_I569delinsC | 1 | Agaimy et al., 2017 |
| W566S | 1 | Agaimy et al., 2017 |
| I569N | 1 | Agaimy et al., 2017 |
| I569V | 1 | Agaimy et al., 2017 |
| I538_L539insR | 2 | Arts et al., 2014 |
| R561C | 1 | Arts et al., 2014 |
| W566_V568delinsL | 1 | Arts et al., 2014 |
| W566R | 1 | Arts et al., 2014 |
| N666K | 2 | Arts et al., 2014 |
| D850V | 2 | Arts et al., 2014 |
| V506_R507insLLSV | 1 | Dachy et al., 2019 |
| I528N | 1 | Dachy et al., 2019 |
| A537D | 1 | Dachy et al., 2019 |
| I538_L539insR | 6 | Dachy et al., 2019 |
| K559_Y562delinsN | 1 | Dachy et al., 2019 |
| R561C | 4 | Dachy et al., 2019 |
| R561_Y562delinsH | 1 | Dachy et al., 2019 |
| Y562_R565del | 1 | Dachy et al., 2019 |
| Y562_V572dup | 1 | Dachy et al., 2019 |
| Y562D | 1 | Dachy et al., 2019 |
| W566R | 2 | Dachy et al., 2019 |
| W566G | 1 | Dachy et al., 2019 |
| W566_V568delinsLeu | 1 | Dachy et al., 2019 |
| Y589D | 1 | Dachy et al., 2019 |
| N666K | 8 | Dachy et al., 2019 |
| N666S | 2 | Dachy et al., 2019 |
| D850V | 2 | Dachy et al., 2019 |
| D850Y | 1 | Dachy et al., 2019 |

Supplementary Table 4. *PDGFRB* sequence variants (amino acid changes) identified in infantile myofibroma cases, as previously described by other groups.1,3,14
